# Supplementary material for: Ventricular Tachycardia as a Late Complication of COVID-19 in a Young Patient With No History of Cardiovascular Disease
Source: PubMed Central journal article supplement — CJC Open. 2024 Feb 4;6(5):721–4. doi: 10.1016/j.cjco.2024.01.010 (PMC11150940; doi:10.1016/j.cjco.2024.01.010), 2024-02-04
Supplement: mmc1.pdf [file mmc1.pdf]

## SUPPLEMENTARY MATERIAL

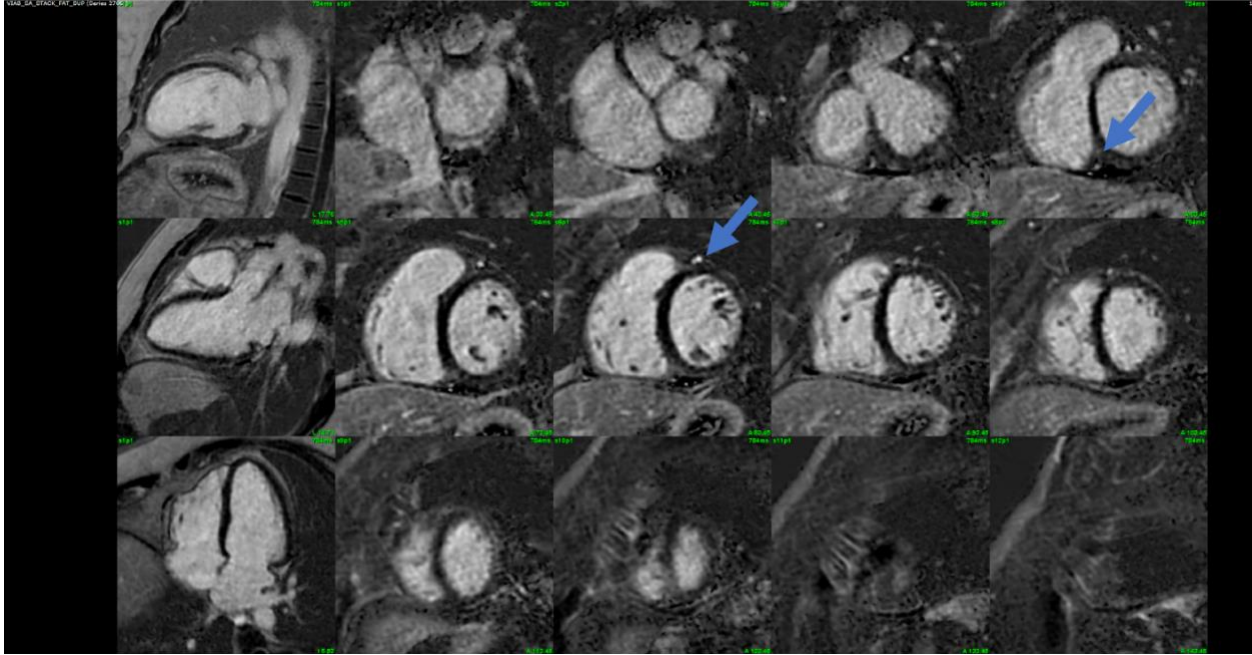

**Supplemental Figure S1.** Delayed Enhancement Magnetic Resonance Imaging of the Patient. *MRI Reading: 1. The left ventricle is borderline dilated and has low normal function. LVEDVi = 99 cc/m<sup>2</sup>. LVEF = 54%. Delayed-enhancement imaging reveals mild delayed enhancement at the basal-to-mid RV insertion points in a non-ischemic pattern, though non-specific. Native T1-mapping reveals normal T1 values. 2. The right ventricle is mildly dilated and has normal function. RVEDVi = 104 cc/m<sup>2</sup>. RVEF = 51%. 3. There is no significant valve disease.*

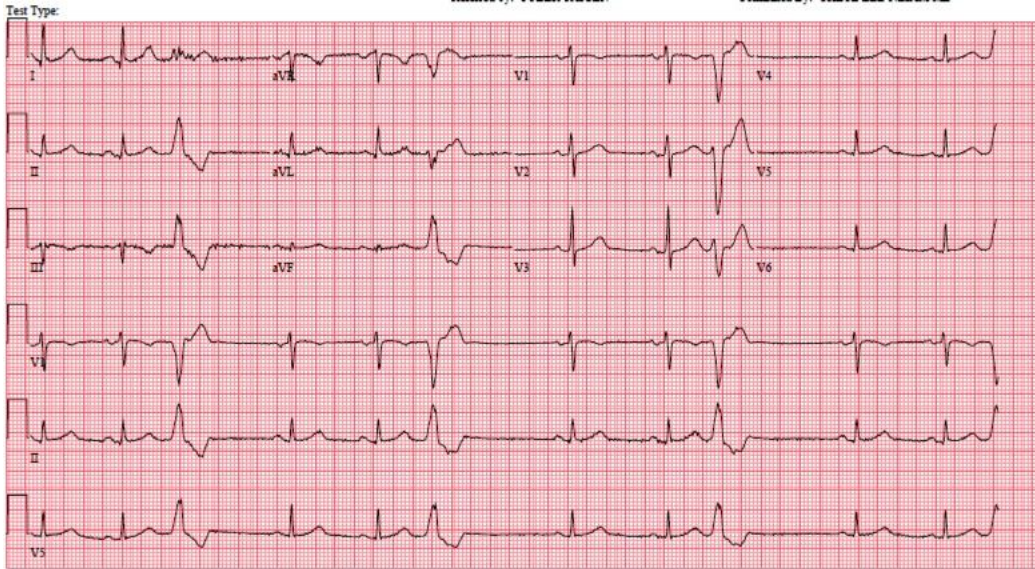

**Supplemental Figure S2.** An electrocardiogram's strip showing the patient's premature ventricular contractions.

**Supplemental Figures S3: Snapshots from the Zio patch and Holter Monitors worn by the patient during the follow up period.**

**A Zio Patch 7.5-Month Post-Covid**

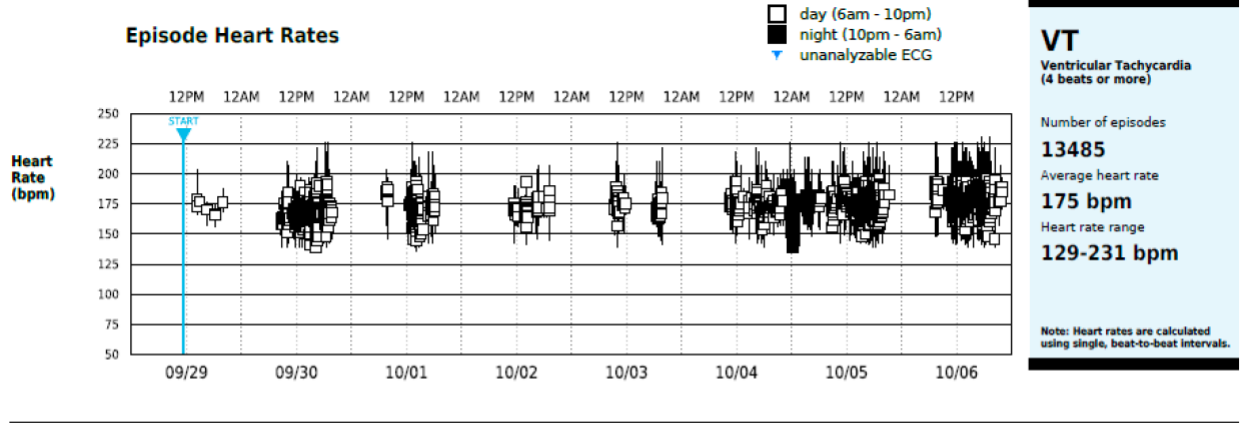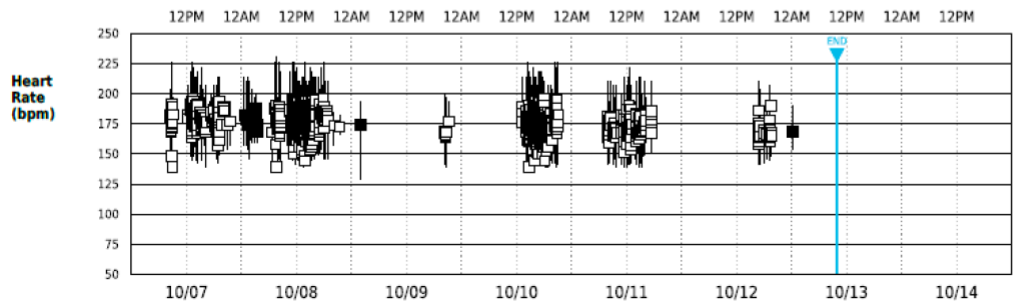

**1** **VT with Fastest Heart Rate**      # Beats: 22      Duration: 7.4 s      Average: 181 bpm      Range: 160-231 bpm      Pt Triggered?  YES  NO

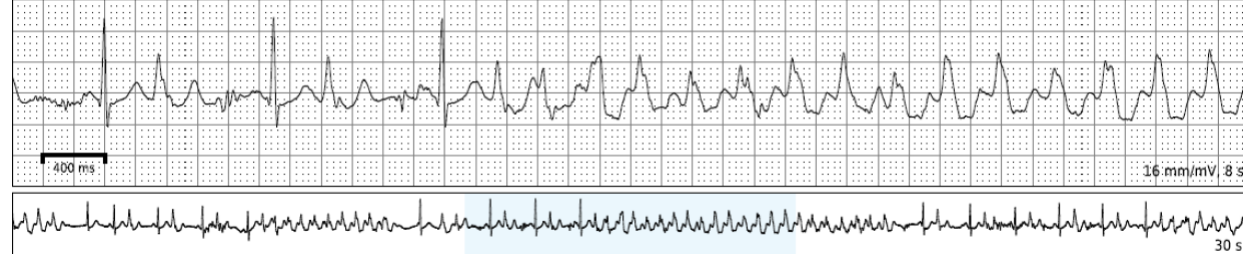

**2** **VT with Fastest Avg. Heart Rate**      # Beats: 8      Duration: 2.6 s      Average: 196 bpm      Range: 187-214 bpm      Pt Triggered?  YES  NO

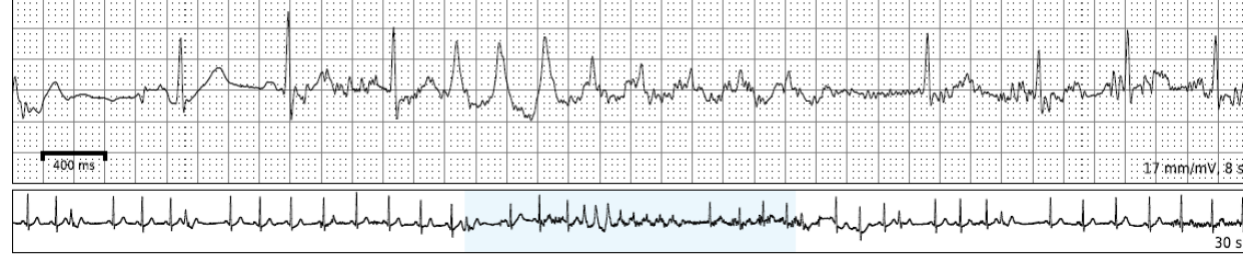

# B

## Zio Patch 13-Month Post-Covid

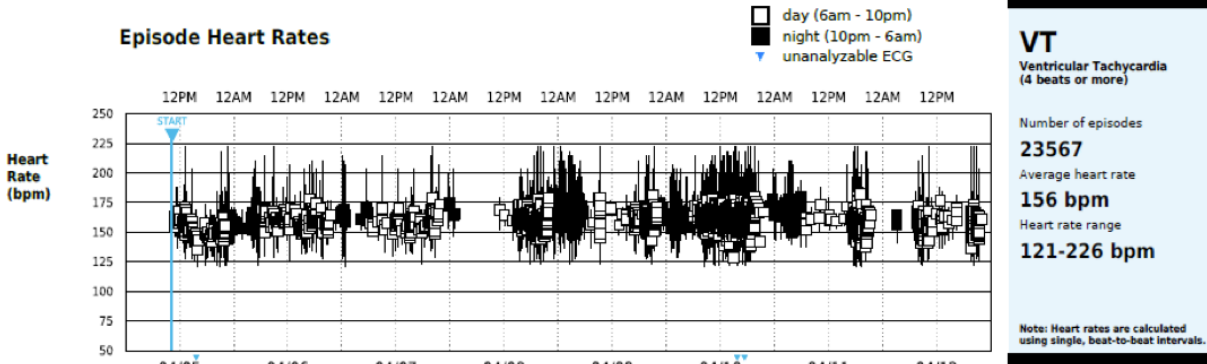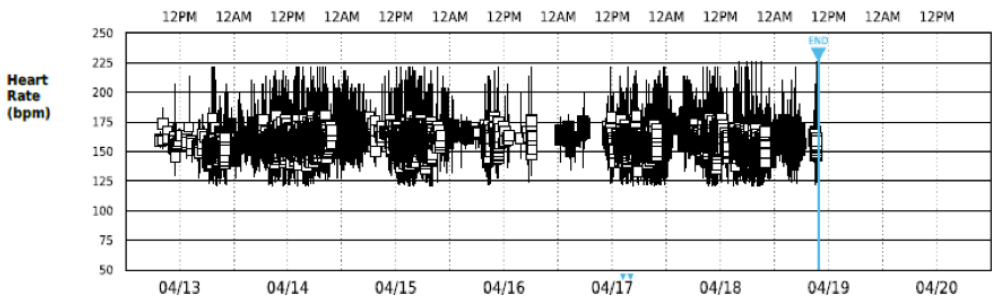

**1** VT with Fastest Heart Rate

|                            |                    |                        |                         |                           |                                                                                             |
|----------------------------|--------------------|------------------------|-------------------------|---------------------------|---------------------------------------------------------------------------------------------|
| <b>04/18/21 04:10:22pm</b> | <b># Beats:</b> 11 | <b>Duration:</b> 3.9 s | <b>Average:</b> 167 bpm | <b>Range:</b> 152-226 bpm | <b>Pt Triggered?</b><br><input type="checkbox"/> YES <input checked="" type="checkbox"/> NO |
|----------------------------|--------------------|------------------------|-------------------------|---------------------------|---------------------------------------------------------------------------------------------|

400 ms 17 mm/mV 30 s

**2** VT with Fastest Avg. Heart Rate

|                            |                   |                        |                         |                           |                                                                                             |
|----------------------------|-------------------|------------------------|-------------------------|---------------------------|---------------------------------------------------------------------------------------------|
| <b>04/18/21 04:18:32am</b> | <b># Beats:</b> 5 | <b>Duration:</b> 1.8 s | <b>Average:</b> 184 bpm | <b>Range:</b> 167-203 bpm | <b>Pt Triggered?</b><br><input type="checkbox"/> YES <input checked="" type="checkbox"/> NO |
|----------------------------|-------------------|------------------------|-------------------------|---------------------------|---------------------------------------------------------------------------------------------|

400 ms 18 mm/mV 30 s



# C Zio Patch 15-Month Post-Covid – off Flecainide

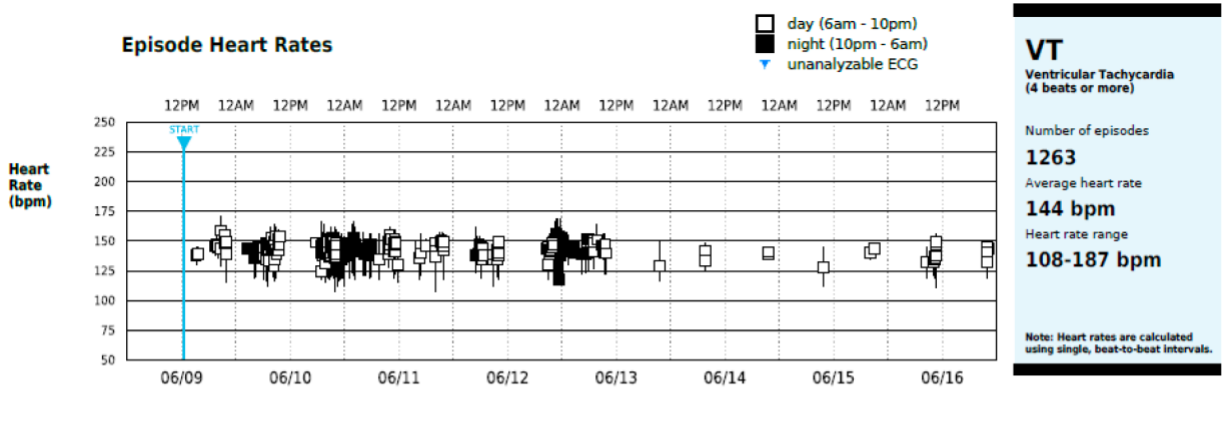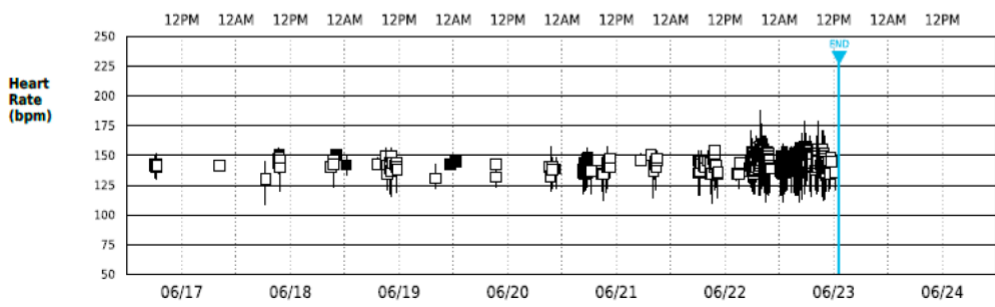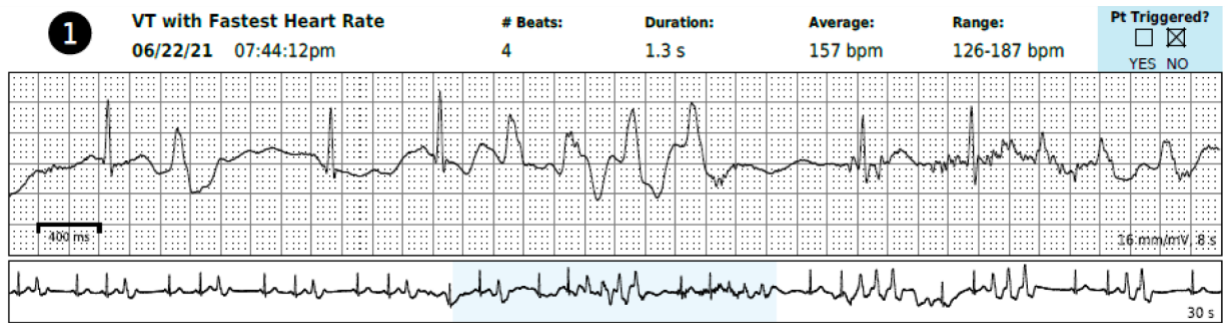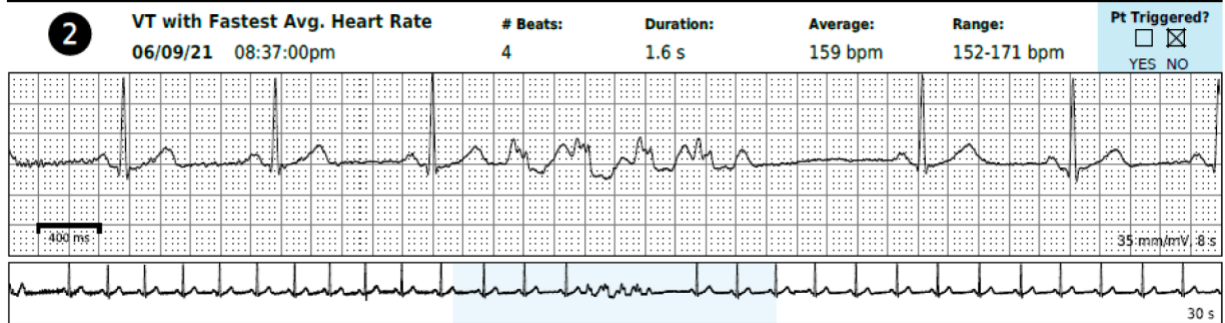

# D Zio Patch 23-Month Post-Covid

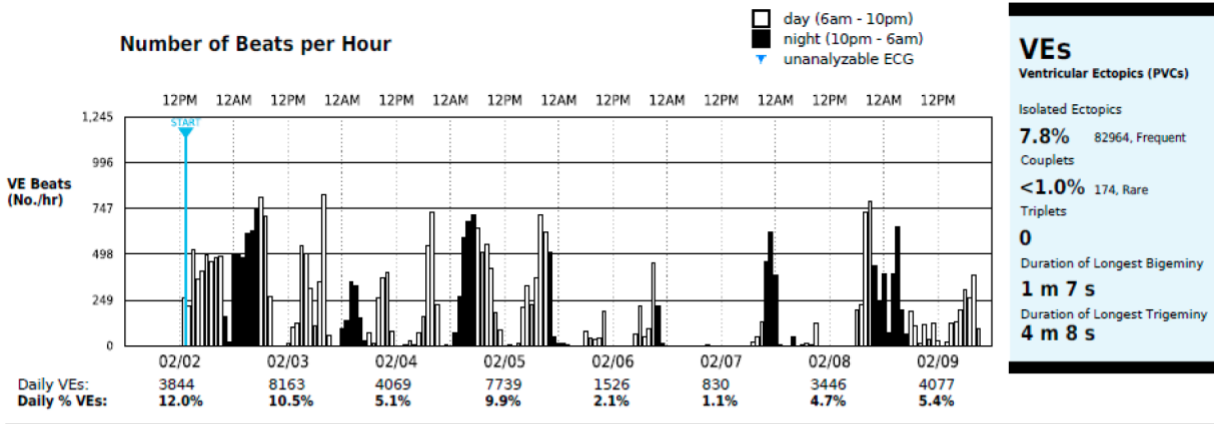

### VEs

Ventricular Ectopics (PVCs)

Isolated Ectopics  
**7.8%** 82964, Frequent

Couplets  
**<1.0%** 174, Rare

Triplets  
**0**

Duration of Longest Bigeminy  
**1 m 7 s**

Duration of Longest Trigeminy  
**4 m 8 s**

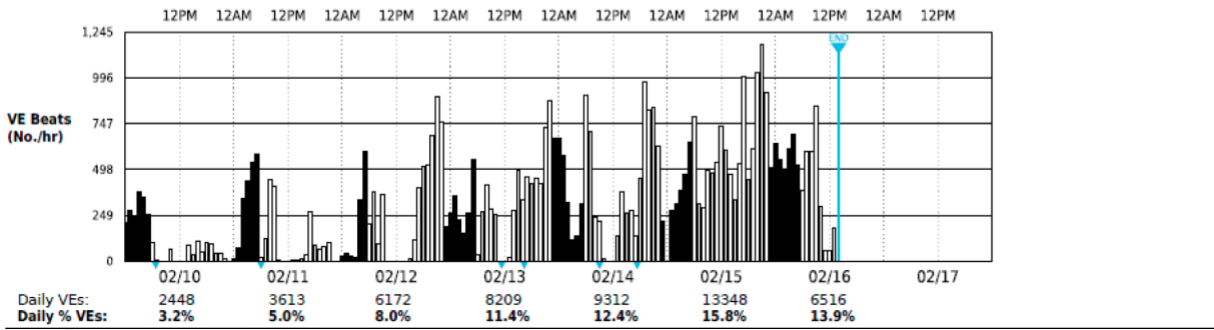

## 1 Isolated VE Beats by Unique Morphology

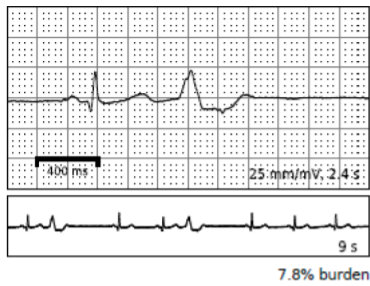

## 2 VE Couplet

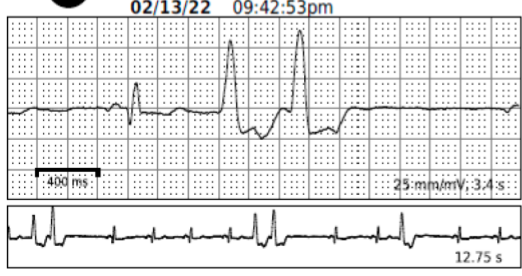

## 3 VE Triplet

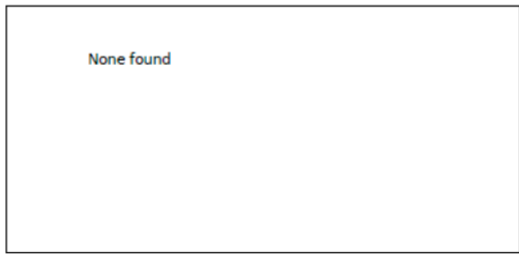

**Supplemental Table S1:** Case reports showing ventricular arrhythmias associated with COVID-19.

| Case                    | Diagnoses                                     | Comorbidities                               | Timing                                       | Treatment                           | Resolution |
|-------------------------|-----------------------------------------------|---------------------------------------------|----------------------------------------------|-------------------------------------|------------|
| Mitacchione et al. (1)  | VT storm with Multiple ICD shocks             | CAD<br>LV dysfunction                       | During COVID                                 | Catheter ablation                   | Yes        |
| Tseng et al. (2)        | Sustained Ventricular tachycardia             | Fulminant myocarditis                       | During COVID                                 | Extracorporeal membrane oxygenation | Yes        |
| Doodnauth et al. (3)    | Sustained Monomorphic Ventricular Tachycardia | Atrial Arrhythmia                           | During treatment with bamlanivimab for COVID | Amiodarone drip                     | Yes        |
| Mukhopadhyay et al. (4) | VT storm                                      | Hyperthyroidism<br>Diabetes<br>ARVC on echo | During COVID                                 | Cardioversion                       | Yes        |
| Liao et al. (5)         | Short run VT                                  | Hypothyroidism                              | During COVID                                 | Iv Amiodarone<br>Levothyroxine      | Yes        |
| Sahnoun et al. (6)      | Premature ventricular contraction             | -                                           | During COVID                                 | Hydroxychloroquine discontinuation  | Yes        |

1. Mitacchione G, Schiavone M, Gasperetti A, Forleo GB. Ventricular tachycardia storm management in a COVID-19 patient: a case report. *Eur Heart J Case Rep.* 2020;4(Fi1):1-6.
2. Tseng YS, Herron C, Garcia R, Cashen K. Sustained ventricular tachycardia in a paediatric patient with acute COVID-19 myocarditis. *Cardiol Young.* 2021;31(9):1510-2.
3. Doodnauth AV, Goel R, Chen L, Uppin V, Malik ZR, Patel KH, et al. Electrical Storm With Incessant Ventricular Tachycardia in a COVID-19 Patient: Review of Current Evidence. *Cureus.* 2021;13(6):e15604.
4. Mukhopadhyay S, Uppal A, Yusuf J, Muheeb G, Agarwal R. COVID-19 induced ventricular tachycardia storm unmasking a clinically silent cardiomyopathy: a case report. *Eur Heart J Case Rep.* 2021;5(7):ytab220.
5. Liao PH, Cheng YC, Liu PY, Lee IT. Primary hypothyroidism with an episode of ventricular tachycardia in a patient with COVID-19: A case report. *Medicine (Baltimore).* 2022;101(25):e29243.
6. Sahnoun D, Abid M, Fathallah N, Belazreg F, Ben Salem C. Hydroxychloroquine-Induced Premature Ventricular Contractions in a Patient With COVID-19 Disease. *Ann Pharmacother.* 2021;55(8):1061-2.
